# Supplementary material for: Occurrence of organochlorine pesticides from typical water sources in YiXing City, Taihu Upper-River Basin, East China
Source: Royal Society of Chemistry journal article supplement (doi:10.1039/c6ra24345b), 2016-01-01
Supplement: c6ra24345b1.pdf [file c6ra24345b1.pdf]

Supporting information

**Table 1** The recovery and MDLs of OCPs in the present study.

| OCPs               | Mean value (ng L <sup>-1</sup> ) | Recovery (%) | MDLs (ng L <sup>-1</sup> ) |
|--------------------|----------------------------------|--------------|----------------------------|
| α-BHC              | 41.62                            | 83.2         | 0.03                       |
| lindane            | 53.04                            | 106          | 0.17                       |
| β-BHC              | 32.4                             | 64.8         | 0.15                       |
| δ-BHC              | 3.85                             | 71.7         | 0.39                       |
| Heptachlor         | 39.83                            | 79.6         | 0.11                       |
| Aldrin             | 33.95                            | 67.9         | 0.18                       |
| Heptachlor epoxide | 44.65                            | 89.2         | 0.22                       |
| γ-chlordane        | 39.55                            | 79.1         | 0.21                       |
| ENDOSULFAN         | 41.9                             | 83.8         | 0.16                       |
| α-chlordane        | 47.8                             | 95.6         | 0.51                       |
| Dieldrin           | 44.95                            | 89.9         | 0.11                       |
| ENDOSULFAN II      | 60.3                             | 120.6        | 0.09                       |
| Endrin aldehyde    | 47.75                            | 95.5         | 0.07                       |
| endosulfan-sulfate | 56                               | 112          | 0.13                       |
| Endrin ketone      | 41                               | 82           | 0.19                       |
| p,p'-DDE           | 43.82                            | 87.65        | 0.12                       |
| p,p'-DDD           | 44.77                            | 89.54        | 0.09                       |
| p,p'-DDT           | 45.18                            | 90.36        | 0.11                       |
